# Supplementary material for: Detection of Aberrant Glycosylation of Serum Haptoglobin for Gastric Cancer Diagnosis Using a Middle-Up-Down Glycoproteome Platform
Source: J Pers Med. 2021 Jun 18;11(6):575. doi: 10.3390/jpm11060575 (PMC8235735; doi:10.3390/jpm11060575)
Supplement: Supplementary file 1 [file jpm-11-00575-s001.zip]

Archive with 4 entries (4 files):
- Suppl_info.pdf
- Table S2. The list of 41 N-glycans of haptoglobin used for construction of in-silico glycopeptide library.xlsx
- Table S3. The list of in-silico haptoglobin glycopeptide library.xlsx
- Table S4. A complete list of glycopeptides found in serum haptoglobin.xlsx
