# Supplementary material for: Detection of Aberrant Glycosylation of Serum Haptoglobin for Gastric Cancer Diagnosis Using a Middle-Up-Down Glycoproteome Platform
Source: J Pers Med. 2021 Jun 18;11(6):575. doi: 10.3390/jpm11060575 (PMC8235735; doi:10.3390/jpm11060575)
Supplement: Supplementary file 1 [file jpm-11-00575-s001.zip › Table S2. The list of 41 N-glycans of haptoglobin used for construction of in-silico glycopeptide library.xlsx]

## Sheet: Sheet1
Table S2. The list of 41 N-glycans of haptoglobin used for construction of in-silico glycopeptide library
Mass	Composition				Class
	Hexose	HexNAc	Fucose	NeuAc
2222.78	5	4	0	2	C-S
2879.01	6	5	0	3	C-S
2587.91	6	5	0	2	CH-S
1931.69	5	4	0	1	CH-S
3025.07	6	5	1	3	C-FS
2296.82	6	5	0	1	CH-S
2733.97	6	5	1	2	CH-FS
1640.59	5	4	0	0	CH
2953.05	7	6	0	2	C-S
2368.84	5	4	1	2	C-FS
3244.14	7	6	0	3	C-S
2077.74	5	4	1	1	CH-FS
2661.95	7	6	0	1	C-S
3390.2	7	6	1	3	C-FS
2005.72	6	5	0	0	CH
2442.88	6	5	1	1	CH-FS
2280.82	5	5	1	1	CH-FS
3099.11	7	6	1	2	C-FS
2093.74	6	4	0	1	H-S
1566.56	4	3	0	1	C-S
3171.13	6	5	2	3	C-FS
1769.63	4	4	0	1	C-S
3042.08	7	5	2	2	H-FS
2134.77	5	5	0	1	CH-S
1989.73	5	5	1	0	CH-F
2425.86	5	5	0	2	C-S
2571.92	5	5	1	2	C-FS
1624.6	4	4	1	0	CH-F
1275.46	4	3	0	0	CH
1786.65	5	4	1	0	CH-F
1462.54	3	4	1	0	C-F
1827.68	4	5	1	0	CH-F
2808.01	7	6	1	1	C-FS
1234.43	5	2	0	0	HM
1396.49	6	2	0	0	HM
1728.61	5	3	0	1	H-S
2896.03	7	5	1	2	H-FS
2384.84	6	4	0	2	H-S
2749.97	7	5	0	2	H-S
1478.54	4	4	0	0	CH
1890.66	6	3	0	1	H-S
