# Supplementary material for: Detection of Aberrant Glycosylation of Serum Haptoglobin for Gastric Cancer Diagnosis Using a Middle-Up-Down Glycoproteome Platform
Source: J Pers Med. 2021 Jun 18;11(6):575. doi: 10.3390/jpm11060575 (PMC8235735; doi:10.3390/jpm11060575)
Supplement: Supplementary file 1 [file jpm-11-00575-s001.zip › Table S3. The list of in-silico haptoglobin glycopeptide library.xlsx]

## Sheet: Sheet1
Table S3. The list of in-silico haptoglobin glycopeptide library
Mass	GP group	Composition	Class
4883.16	GP1	5_4_0_2	C-S
5539.39	GP1	6_5_0_3	C-S
5248.29	GP1	6_5_0_2	CH-S
4592.06	GP1	5_4_0_1	CH-S
5685.44	GP1	6_5_1_3	C-FS
4957.19	GP1	6_5_0_1	CH-S
5394.35	GP1	6_5_1_2	CH-FS
4300.97	GP1	5_4_0_0	CH
5613.42	GP1	7_6_0_2	C-S
5029.22	GP1	5_4_1_2	C-FS
5904.52	GP1	7_6_0_3	C-S
4738.12	GP1	5_4_1_1	CH-FS
5322.33	GP1	7_6_0_1	C-S
6050.57	GP1	7_6_1_3	C-FS
4666.1	GP1	6_5_0_0	CH
5103.25	GP1	6_5_1_1	CH-FS
4941.2	GP1	5_5_1_1	CH-FS
5759.48	GP1	7_6_1_2	C-FS
4754.11	GP1	6_4_0_1	H-S
4226.93	GP1	4_3_0_1	C-S
5831.5	GP1	6_5_2_3	C-FS
4430.01	GP1	4_4_0_1	C-S
5702.46	GP1	7_5_2_2	H-FS
4795.14	GP1	5_5_0_1	CH-S
4650.1	GP1	5_5_1_0	CH-F
5086.24	GP1	5_5_0_2	C-S
5232.3	GP1	5_5_1_2	C-FS
4284.97	GP1	4_4_1_0	CH-F
3935.83	GP1	4_3_0_0	CH
4447.02	GP1	5_4_1_0	CH-F
4122.92	GP1	3_4_1_0	C-F
4488.05	GP1	4_5_1_0	CH-F
5468.38	GP1	7_6_1_1	C-FS
3894.81	GP1	5_2_0_0	HM
4056.86	GP1	6_2_0_0	HM
4388.98	GP1	5_3_0_1	H-S
5556.4	GP1	7_5_1_2	H-FS
5045.21	GP1	6_4_0_2	H-S
5410.34	GP1	7_5_0_2	H-S
4138.91	GP1	4_4_0_0	CH
4551.03	GP1	6_3_0_1	H-S
4034.8	GP3	5_4_0_2	C-S
4691.02	GP3	6_5_0_3	C-S
4399.93	GP3	6_5_0_2	CH-S
3743.7	GP3	5_4_0_1	CH-S
4837.08	GP3	6_5_1_3	C-FS
4108.83	GP3	6_5_0_1	CH-S
4545.99	GP3	6_5_1_2	CH-FS
3452.61	GP3	5_4_0_0	CH
4765.06	GP3	7_6_0_2	C-S
4180.85	GP3	5_4_1_2	C-FS
5056.16	GP3	7_6_0_3	C-S
3889.76	GP3	5_4_1_1	CH-FS
4473.97	GP3	7_6_0_1	C-S
5202.22	GP3	7_6_1_3	C-FS
3817.74	GP3	6_5_0_0	CH
4254.89	GP3	6_5_1_1	CH-FS
4092.84	GP3	5_5_1_1	CH-FS
4911.12	GP3	7_6_1_2	C-FS
3905.76	GP3	6_4_0_1	H-S
3378.57	GP3	4_3_0_1	C-S
4983.14	GP3	6_5_2_3	C-FS
3581.65	GP3	4_4_0_1	C-S
4854.1	GP3	7_5_2_2	H-FS
3946.78	GP3	5_5_0_1	CH-S
3801.74	GP3	5_5_1_0	CH-F
4237.88	GP3	5_5_0_2	C-S
4383.94	GP3	5_5_1_2	C-FS
3436.61	GP3	4_4_1_0	CH-F
3087.47	GP3	4_3_0_0	CH
3598.66	GP3	5_4_1_0	CH-F
3274.56	GP3	3_4_1_0	C-F
3639.69	GP3	4_5_1_0	CH-F
4620.02	GP3	7_6_1_1	C-FS
3046.45	GP3	5_2_0_0	HM
3208.5	GP3	6_2_0_0	HM
3540.62	GP3	5_3_0_1	H-S
4708.04	GP3	7_5_1_2	H-FS
4196.85	GP3	6_4_0_2	H-S
4561.98	GP3	7_5_0_2	H-S
3290.55	GP3	4_4_0_0	CH
3702.68	GP3	6_3_0_1	H-S
2674.15	GP2	5_2_0_0	GP2
2715.18	GP2	4_3_0_0	GP2
2836.2	GP2	6_2_0_0	GP2
2902.26	GP2	3_4_1_0	GP2
2918.26	GP2	4_4_0_0	GP2
3006.27	GP2	4_3_0_1	GP2
3064.31	GP2	4_4_1_0	GP2
3080.31	GP2	5_4_0_0	GP2
3168.32	GP2	5_3_0_1	GP2
3209.35	GP2	4_4_0_1	GP2
3226.37	GP2	5_4_1_0	GP2
3267.39	GP2	4_5_1_0	GP2
3330.38	GP2	6_3_0_1	GP2
3371.4	GP2	5_4_0_1	GP2
3429.45	GP2	5_5_1_0	GP2
3445.44	GP2	6_5_0_0	GP2
3517.46	GP2	5_4_1_1	GP2
3533.46	GP2	6_4_0_1	GP2
3574.48	GP2	5_5_0_1	GP2
3662.5	GP2	5_4_0_2	GP2
3720.54	GP2	5_5_1_1	GP2
3736.54	GP2	6_5_0_1	GP2
3808.56	GP2	5_4_1_2	GP2
3824.55	GP2	6_4_0_2	GP2
3865.58	GP2	5_5_0_2	GP2
3882.59	GP2	6_5_1_1	GP2
3890.57	GP2	10_4_0_0	GP2
3931.6	GP2	9_5_0_0	GP2
3972.63	GP2	8_6_0_0	GP2
4011.64	GP2	5_5_1_2	GP2
4027.63	GP2	6_5_0_2	GP2
4052.62	GP2	11_4_0_0	GP2
4093.65	GP2	10_5_0_0	GP2
4101.67	GP2	7_6_0_1	GP2
4118.68	GP2	8_6_1_0	GP2
4134.68	GP2	9_6_0_0	GP2
4159.71	GP2	7_7_1_0	GP2
4173.69	GP2	6_5_1_2	GP2
4175.7	GP2	8_7_0_0	GP2
4189.68	GP2	7_5_0_2	GP2
4214.68	GP2	12_4_0_0	GP2
4222.69	GP2	9_5_0_1	GP2
4247.73	GP2	7_6_1_1	GP2
4263.72	GP2	8_6_0_1	GP2
4280.74	GP2	9_6_1_0	GP2
4296.73	GP2	10_6_0_0	GP2
4318.73	GP2	6_5_0_3	GP2
4321.76	GP2	8_7_1_0	GP2
4335.74	GP2	7_5_1_2	GP2
4337.76	GP2	9_7_0_0	GP2
4346.79	GP2	6_8_2_0	GP2
4362.79	GP2	7_8_1_0	GP2
4378.78	GP2	8_8_0_0	GP2
4384.75	GP2	10_5_0_1	GP2
4392.76	GP2	7_6_0_2	GP2
4425.77	GP2	9_6_0_1	GP2
4442.79	GP2	10_6_1_0	GP2
4450.81	GP2	7_7_1_1	GP2
4458.78	GP2	11_6_0_0	GP2
4464.78	GP2	6_5_1_3	GP2
4466.8	GP2	8_7_0_1	GP2
4481.8	GP2	7_5_2_2	GP2
4483.82	GP2	9_7_1_0	GP2
4508.85	GP2	7_8_2_0	GP2
4524.84	GP2	8_8_1_0	GP2
4538.82	GP2	7_6_1_2	GP2
4540.84	GP2	9_8_0_0	GP2
4546.8	GP2	11_5_0_1	GP2
4554.82	GP2	8_6_0_2	GP2
4587.83	GP2	10_6_0_1	GP2
4604.84	GP2	11_6_1_0	GP2
4610.84	GP2	6_5_2_3	GP2
4612.86	GP2	8_7_1_1	GP2
4628.85	GP2	9_7_0_1	GP2
4645.87	GP2	10_7_1_0	GP2
4653.88	GP2	7_8_1_1	GP2
4661.86	GP2	11_7_0_0	GP2
4669.88	GP2	8_8_0_1	GP2
4670.9	GP2	8_8_2_0	GP2
4683.86	GP2	7_6_0_3	GP2
4686.89	GP2	9_8_1_0	GP2
4702.89	GP2	10_8_0_0	GP2
4708.85	GP2	12_5_0_1	GP2
4711.93	GP2	7_9_2_0	GP2
4716.87	GP2	9_6_0_2	GP2
4727.92	GP2	8_9_1_0	GP2
4733.88	GP2	10_6_1_1	GP2
4749.88	GP2	11_6_0_1	GP2
4757.9	GP2	8_7_0_2	GP2
4774.91	GP2	9_7_1_1	GP2
4790.91	GP2	10_7_0_1	GP2
4807.92	GP2	11_7_1_0	GP2
4815.94	GP2	8_8_1_1	GP2
4823.92	GP2	12_7_0_0	GP2
4829.92	GP2	7_6_1_3	GP2
4831.93	GP2	9_8_0_1	GP2
4832.95	GP2	9_8_2_0	GP2
4848.95	GP2	10_8_1_0	GP2
4873.98	GP2	8_9_2_0	GP2
4878.92	GP2	10_6_0_2	GP2
4889.97	GP2	9_9_1_0	GP2
4895.94	GP2	11_6_1_1	GP2
4905.97	GP2	10_9_0_0	GP2
4911.93	GP2	12_6_0_1	GP2
4919.95	GP2	9_7_0_2	GP2
4936.96	GP2	10_7_1_1	GP2
4952.96	GP2	11_7_0_1	GP2
4960.97	GP2	8_8_0_2	GP2
4962	GP2	8_8_2_1	GP2
4977.99	GP2	9_8_1_1	GP2
4993.98	GP2	10_8_0_1	GP2
4995.01	GP2	10_8_2_0	GP2
5019.02	GP2	8_9_1_1	GP2
5024.98	GP2	10_6_1_2	GP2
5035.01	GP2	9_9_0_1	GP2
5036.03	GP2	9_9_2_0	GP2
5040.97	GP2	11_6_0_2	GP2
5052.03	GP2	10_9_1_0	GP2
5066.01	GP2	9_7_1_2	GP2
5068.02	GP2	11_9_0_0	GP2
5077.06	GP2	8_10_2_0	GP2
5082	GP2	10_7_0_2	GP2
5099.02	GP2	11_7_1_1	GP2
5107.03	GP2	8_8_1_2	GP2
5115.01	GP2	12_7_0_1	GP2
5123.03	GP2	9_8_0_2	GP2
5124.05	GP2	9_8_2_1	GP2
5140.04	GP2	10_8_1_1	GP2
5156.04	GP2	11_8_0_1	GP2
5165.07	GP2	8_9_2_1	GP2
5181.07	GP2	9_9_1_1	GP2
5187.03	GP2	11_6_1_2	GP2
5197.06	GP2	10_9_0_1	GP2
5198.08	GP2	10_9_2_0	GP2
5203.03	GP2	12_6_0_2	GP2
5211.04	GP2	9_7_0_3	GP2
5214.08	GP2	11_9_1_0	GP2
5228.06	GP2	10_7_1_2	GP2
5239.11	GP2	9_10_2_0	GP2
5244.05	GP2	11_7_0_2	GP2
5253.09	GP2	8_8_2_2	GP2
5255.11	GP2	10_10_1_0	GP2
5261.07	GP2	12_7_1_1	GP2
5269.09	GP2	9_8_1_2	GP2
5285.08	GP2	10_8_0_2	GP2
5286.1	GP2	10_8_2_1	GP2
5302.1	GP2	11_8_1_1	GP2
5310.11	GP2	8_9_1_2	GP2
5318.09	GP2	12_8_0_1	GP2
5326.11	GP2	9_9_0_2	GP2
5327.13	GP2	9_9_2_1	GP2
5343.12	GP2	10_9_1_1	GP2
5357.1	GP2	9_7_1_3	GP2
5359.12	GP2	11_9_0_1	GP2
5373.1	GP2	10_7_0_3	GP2
5384.15	GP2	9_10_1_1	GP2
5390.11	GP2	11_7_1_2	GP2
5401.16	GP2	10_10_2_0	GP2
5406.11	GP2	12_7_0_2	GP2
5414.12	GP2	9_8_0_3	GP2
5415.14	GP2	9_8_2_2	GP2
5417.16	GP2	11_10_1_0	GP2
5431.14	GP2	10_8_1_2	GP2
5433.15	GP2	12_10_0_0	GP2
5447.13	GP2	11_8_0_2	GP2
5456.17	GP2	8_9_2_2	GP2
5464.15	GP2	12_8_1_1	GP2
5472.16	GP2	9_9_1_2	GP2
5480.14	GP2	13_8_0_1	GP2
5488.16	GP2	10_9_0_2	GP2
5489.18	GP2	10_9_2_1	GP2
5505.18	GP2	11_9_1_1	GP2
5519.15	GP2	10_7_1_3	GP2
5521.17	GP2	12_9_0_1	GP2
5530.21	GP2	9_10_2_1	GP2
5535.15	GP2	11_7_0_3	GP2
5546.2	GP2	10_10_1_1	GP2
5552.16	GP2	12_7_1_2	GP2
5560.18	GP2	9_8_1_3	GP2
5562.2	GP2	11_10_0_1	GP2
5568.16	GP2	13_7_0_2	GP2
5576.18	GP2	10_8_0_3	GP2
5577.2	GP2	10_8_2_2	GP2
5593.19	GP2	11_8_1_2	GP2
5609.19	GP2	12_8_0_2	GP2
5617.2	GP2	9_9_0_3	GP2
5618.22	GP2	9_9_2_2	GP2
5626.2	GP2	13_8_1_1	GP2
5634.22	GP2	10_9_1_2	GP2
5650.21	GP2	11_9_0_2	GP2
5651.23	GP2	11_9_2_1	GP2
5675.24	GP2	9_10_1_2	GP2
5681.21	GP2	11_7_1_3	GP2
5691.24	GP2	10_10_0_2	GP2
5692.26	GP2	10_10_2_1	GP2
5697.2	GP2	12_7_0_3	GP2
5698.22	GP2	12_7_2_2	GP2
5708.25	GP2	11_10_1_1	GP2
5714.22	GP2	13_7_1_2	GP2
5722.23	GP2	10_8_1_3	GP2
5724.25	GP2	12_10_0_1	GP2
5738.23	GP2	11_8_0_3	GP2
5739.25	GP2	11_8_2_2	GP2
5755.24	GP2	12_8_1_2	GP2
5763.26	GP2	9_9_1_3	GP2
5771.24	GP2	13_8_0_2	GP2
5779.26	GP2	10_9_0_3	GP2
5780.28	GP2	10_9_2_2	GP2
5796.27	GP2	11_9_1_2	GP2
5812.27	GP2	12_9_0_2	GP2
5821.3	GP2	9_10_2_2	GP2
5827.26	GP2	11_7_2_3	GP2
5837.3	GP2	10_10_1_2	GP2
5843.26	GP2	12_7_1_3	GP2
5853.29	GP2	11_10_0_2	GP2
5854.31	GP2	11_10_2_1	GP2
5860.28	GP2	13_7_2_2	GP2
5867.27	GP2	10_8_0_4	GP2
5868.29	GP2	10_8_2_3	GP2
5870.31	GP2	12_10_1_1	GP2
5884.29	GP2	11_8_1_3	GP2
5900.28	GP2	12_8_0_3	GP2
5909.32	GP2	9_9_2_3	GP2
5911.33	GP2	11_11_1_1	GP2
5917.3	GP2	13_8_1_2	GP2
5925.31	GP2	10_9_1_3	GP2
5926.33	GP2	10_9_3_2	GP2
5941.31	GP2	11_9_0_3	GP2
5942.33	GP2	11_9_2_2	GP2
5958.32	GP2	12_9_1_2	GP2
5974.32	GP2	13_9_0_2	GP2
5982.33	GP2	10_10_0_3	GP2
5983.35	GP2	10_10_2_2	GP2
5989.32	GP2	12_7_2_3	GP2
5999.35	GP2	11_10_1_2	GP2
6013.33	GP2	10_8_1_4	GP2
6015.34	GP2	12_10_0_2	GP2
6016.37	GP2	12_10_2_1	GP2
6029.32	GP2	11_8_0_4	GP2
6030.34	GP2	11_8_2_3	GP2
6046.34	GP2	12_8_1_3	GP2
6055.38	GP2	9_9_3_3	GP2
6057.39	GP2	11_11_2_1	GP2
6062.33	GP2	13_8_0_3	GP2
6070.35	GP2	10_9_0_4	GP2
6071.37	GP2	10_9_2_3	GP2
6073.39	GP2	12_11_1_1	GP2
6087.37	GP2	11_9_1_3	GP2
6088.39	GP2	11_9_3_2	GP2
6089.38	GP2	13_11_0_1	GP2
6103.36	GP2	12_9_0_3	GP2
6104.38	GP2	12_9_2_2	GP2
6120.38	GP2	13_9_1_2	GP2
6128.39	GP2	10_10_1_3	GP2
6144.39	GP2	11_10_0_3	GP2
6145.41	GP2	11_10_2_2	GP2
6159.39	GP2	10_8_2_4	GP2
6161.4	GP2	12_10_1_2	GP2
6175.38	GP2	11_8_1_4	GP2
6177.4	GP2	13_10_0_2	GP2
6191.38	GP2	12_8_0_4	GP2
6192.4	GP2	12_8_2_3	GP2
6202.43	GP2	11_11_1_2	GP2
6208.39	GP2	13_8_1_3	GP2
6216.41	GP2	10_9_1_4	GP2
6217.43	GP2	10_9_3_3	GP2
6218.42	GP2	12_11_0_2	GP2
6219.44	GP2	12_11_2_1	GP2
6232.4	GP2	11_9_0_4	GP2
6233.42	GP2	11_9_2_3	GP2
6235.44	GP2	13_11_1_1	GP2
6249.42	GP2	12_9_1_3	GP2
6250.44	GP2	12_9_3_2	GP2
6265.41	GP2	13_9_0_3	GP2
6273.43	GP2	10_10_0_4	GP2
6274.45	GP2	10_10_2_3	GP2
6290.45	GP2	11_10_1_3	GP2
6291.47	GP2	11_10_3_2	GP2
6306.44	GP2	12_10_0_3	GP2
6307.46	GP2	12_10_2_2	GP2
6321.44	GP2	11_8_2_4	GP2
6323.46	GP2	13_10_1_2	GP2
6337.43	GP2	12_8_1_4	GP2
6348.49	GP2	11_11_2_2	GP2
6354.45	GP2	13_8_2_3	GP2
6362.47	GP2	10_9_2_4	GP2
6364.48	GP2	12_11_1_2	GP2
6378.46	GP2	11_9_1_4	GP2
6379.48	GP2	11_9_3_3	GP2
6380.48	GP2	13_11_0_2	GP2
6394.46	GP2	12_9_0_4	GP2
6395.48	GP2	12_9_2_3	GP2
6411.47	GP2	13_9_1_3	GP2
6419.49	GP2	10_10_1_4	GP2
6420.51	GP2	10_10_3_3	GP2
6435.48	GP2	11_10_0_4	GP2
6436.5	GP2	11_10_2_3	GP2
6452.5	GP2	12_10_1_3	GP2
6453.52	GP2	12_10_3_2	GP2
6468.49	GP2	13_10_0_3	GP2
6469.51	GP2	13_10_2_2	GP2
6483.49	GP2	12_8_2_4	GP2
6493.52	GP2	11_11_1_3	GP2
6509.52	GP2	12_11_0_3	GP2
6510.54	GP2	12_11_2_2	GP2
6523.5	GP2	11_9_0_5	GP2
6524.52	GP2	11_9_2_4	GP2
6526.53	GP2	13_11_1_2	GP2
6540.51	GP2	12_9_1_4	GP2
6541.53	GP2	12_9_3_3	GP2
6556.51	GP2	13_9_0_4	GP2
6557.53	GP2	13_9_2_3	GP2
6565.55	GP2	10_10_2_4	GP2
6581.54	GP2	11_10_1_4	GP2
6582.56	GP2	11_10_3_3	GP2
6597.54	GP2	12_10_0_4	GP2
6598.56	GP2	12_10_2_3	GP2
6614.55	GP2	13_10_1_3	GP2
6639.58	GP2	11_11_2_3	GP2
6655.58	GP2	12_11_1_3	GP2
6669.56	GP2	11_9_1_5	GP2
6670.58	GP2	11_9_3_4	GP2
6671.57	GP2	13_11_0_3	GP2
6672.59	GP2	13_11_2_2	GP2
6685.55	GP2	12_9_0_5	GP2
6686.57	GP2	12_9_2_4	GP2
6702.57	GP2	13_9_1_4	GP2
6726.58	GP2	11_10_0_5	GP2
6727.6	GP2	11_10_2_4	GP2
6743.59	GP2	12_10_1_4	GP2
6744.61	GP2	12_10_3_3	GP2
6745.61	GP2	14_12_0_2	GP2
6759.59	GP2	13_10_0_4	GP2
6760.61	GP2	13_10_2_3	GP2
6800.61	GP2	12_11_0_4	GP2
6801.64	GP2	12_11_2_3	GP2
6815.61	GP2	11_9_2_5	GP2
6817.63	GP2	13_11_1_3	GP2
6831.61	GP2	12_9_1_5	GP2
6832.63	GP2	12_9_3_4	GP2
6833.63	GP2	14_11_0_3	GP2
6848.62	GP2	13_9_2_4	GP2
6872.64	GP2	11_10_1_5	GP2
6873.66	GP2	11_10_3_4	GP2
6888.63	GP2	12_10_0_5	GP2
6889.65	GP2	12_10_2_4	GP2
6891.67	GP2	14_12_1_2	GP2
6905.65	GP2	13_10_1_4	GP2
6906.67	GP2	13_10_3_3	GP2
6921.64	GP2	14_10_0_4	GP2
6946.67	GP2	12_11_1_4	GP2
6961.67	GP2	11_9_3_5	GP2
6962.67	GP2	13_11_0_4	GP2
6963.69	GP2	13_11_2_3	GP2
6977.67	GP2	12_9_2_5	GP2
6979.68	GP2	14_11_1_3	GP2
7018.69	GP2	11_10_2_5	GP2
7034.69	GP2	12_10_1_5	GP2
7035.71	GP2	12_10_3_4	GP2
7036.7	GP2	14_12_0_3	GP2
7037.72	GP2	14_12_2_2	GP2
7050.68	GP2	13_10_0_5	GP2
7051.7	GP2	13_10_2_4	GP2
7067.7	GP2	14_10_1_4	GP2
7091.71	GP2	12_11_0_5	GP2
7092.73	GP2	12_11_2_4	GP2
7108.73	GP2	13_11_1_4	GP2
7124.72	GP2	14_11_0_4	GP2
7125.74	GP2	14_11_2_3	GP2
7164.75	GP2	11_10_3_5	GP2
7179.73	GP2	12_10_0_6	GP2
7180.75	GP2	12_10_2_5	GP2
7182.76	GP2	14_12_1_3	GP2
7196.74	GP2	13_10_1_5	GP2
7197.76	GP2	13_10_3_4	GP2
7213.76	GP2	14_10_2_4	GP2
7237.77	GP2	12_11_1_5	GP2
7253.76	GP2	13_11_0_5	GP2
7254.78	GP2	13_11_2_4	GP2
7270.78	GP2	14_11_1_4	GP2
7271.8	GP2	14_11_3_3	GP2
7325.78	GP2	12_10_1_6	GP2
7326.8	GP2	12_10_3_5	GP2
7327.8	GP2	14_12_0_4	GP2
7328.82	GP2	14_12_2_3	GP2
7342.8	GP2	13_10_2_5	GP2
7359.81	GP2	14_10_3_4	GP2
7383.83	GP2	12_11_2_5	GP2
7399.82	GP2	13_11_1_5	GP2
7400.84	GP2	13_11_3_4	GP2
7415.82	GP2	14_11_0_5	GP2
7416.84	GP2	14_11_2_4	GP2
7471.84	GP2	12_10_2_6	GP2
7473.86	GP2	14_12_1_4	GP2
7488.86	GP2	13_10_3_5	GP2
7505.87	GP2	14_10_4_4	GP2
7544.86	GP2	13_11_0_6	GP2
7545.88	GP2	13_11_2_5	GP2
7561.87	GP2	14_11_1_5	GP2
7562.89	GP2	14_11_3_4	GP2
7617.9	GP2	12_10_3_6	GP2
7618.9	GP2	14_12_0_5	GP2
7619.92	GP2	14_12_2_4	GP2
7634.92	GP2	13_10_4_5	GP2
7690.92	GP2	13_11_1_6	GP2
7691.94	GP2	13_11_3_5	GP2
7707.93	GP2	14_11_2_5	GP2
7763.96	GP2	12_10_4_6	GP2
7764.95	GP2	14_12_1_5	GP2
7836.97	GP2	13_11_2_6	GP2
7853.99	GP2	14_11_3_5	GP2
7909.99	GP2	14_12_0_6	GP2
7911.01	GP2	14_12_2_5	GP2
7983.03	GP2	13_11_3_6	GP2
8056.05	GP2	14_12_1_6	GP2
8202.11	GP2	14_12_2_6	GP2
