# Supplementary material for: Detection of Aberrant Glycosylation of Serum Haptoglobin for Gastric Cancer Diagnosis Using a Middle-Up-Down Glycoproteome Platform
Source: J Pers Med. 2021 Jun 18;11(6):575. doi: 10.3390/jpm11060575 (PMC8235735; doi:10.3390/jpm11060575)
Supplement: Supplementary file 1 [file jpm-11-00575-s001.zip › Table S4. A complete list of glycopeptides found in serum haptoglobin.xlsx]

## Sheet: GP1
GP mass	Hex	HexNAc	Fuc	NeuAc	Class	Frequency	p-value
4883.16	5	4	0	2	C-S	100	3.13231e-11
4592.06	5	4	0	1	CH-S	100	0.000841777
5539.39	6	5	0	3	C-S	100	0.0434457
5248.29	6	5	0	2	CH-S	100	0.0219263
4226.93	4	3	0	1	C-S	100	3.11267e-11
4300.97	5	4	0	0	CH	100	0.000474076
4957.19	6	5	0	1	CH-S	99	0.0302398
3935.83	4	3	0	0	CH	99	0.00382147
5029.22	5	4	1	2	C-FS	100	1.13709e-05
4754.11	6	4	0	1	H-S	97	8.63378e-11
4738.12	5	4	1	1	CH-FS	98	1.16843e-08
4430.01	4	4	0	1	C-S	96	1.188e-05
5685.44	6	5	1	3	C-FS	100	1.1204e-06
4138.91	4	4	0	0	CH	80	0.00350363
5394.35	6	5	1	2	CH-FS	97	1.19069e-07
5613.42	7	6	0	2	C-S	88	0.0669502

## Sheet: GP2
GP mass	Hex	HexNAc	Fuc	NeuAc	Class	Frequency	p-value
5576.18	10	8	0	3	GP2	100	0.00623088
5867.27	10	8	0	4	GP2	100	8.17569e-08
4792.69	11	9	0	4	GP2	100	0.447749
5083.78	11	9	0	5	GP2	100	0.0135536
5448.92	12	10	0	5	GP2	99	0.518665
5740.01	12	10	0	6	GP2	97	0.559631
4501.59	11	9	0	3	GP2	100	0.337568
5157.82	12	10	0	4	GP2	100	0.430352
3845.36	10	8	0	2	GP2	100	0.04329
4938.75	11	9	1	4	GP2	100	9.32167e-11
5229.84	11	9	1	5	GP2	99	6.78397e-09
2612.91	11	4	0	0	GP2	88	0.0403056
1566.56	4	3	0	1	GP2	99	1.73516e-05
4866.72	12	10	0	3	GP2	99	0.272524
4282.52	10	8	1	3	GP2	100	3.27987e-09
5594.97	12	10	1	5	GP2	98	1.85625e-09
3480.23	9	7	0	2	GP2	100	0.00132725
5814.05	13	11	0	5	GP2	96	0.649492
5886.07	12	10	1	6	GP2	95	7.502e-10
5522.95	13	11	0	4	GP2	90	0.970305
4210.5	11	9	0	2	GP2	92	0.880122
3771.33	9	7	0	3	GP2	100	1.76611e-05
4573.61	10	8	1	4	GP2	100	2.31575e-08
2222.78	5	4	0	2	GP2	68	1.6501e-05
5303.88	12	10	1	4	GP2	99	1.7429e-07
4647.65	11	9	1	3	GP2	100	8.45596e-05
1931.69	5	4	0	1	GP2	97	2.2744e-05
3269.14	12	5	0	1	GP2	72	0.00974068
6105.14	13	11	0	6	GP2	88	0.128636
3318.18	8	7	0	2	GP2	91	0.00218256
6032.13	12	10	2	6	GP2	85	6.29601e-07
6179.18	14	12	0	5	GP2	72	0.0121142
3189.14	9	7	0	1	GP2	97	0.0315215
5012.78	12	10	1	3	GP2	83	4.12885e-05
5960.11	13	11	1	5	GP2	88	2.84459e-09
6251.2	13	11	1	6	GP2	81	1.95844e-06

## Sheet: GP3
GP mass	Hex	HexNAc	Fuc	NeuAc	Class	Frequency	p-value
4160.83	6	4	0	2	H-S	98	7.81639e-12
4144.83	5	4	1	2	C-FS	99	3.51435e-09
3998.78	5	4	0	2	C-S	100	5.54012e-09
3869.73	6	4	0	1	H-S	98	9.62988e-09
3342.55	4	3	0	1	C-S	100	1.19284e-08
3545.63	4	4	0	1	C-S	100	1.33437e-07
3051.45	4	3	0	0	CH	100	3.22903e-07
4801.06	6	5	1	3	C-FS	100	1.75219e-06
4509.97	6	5	1	2	CH-FS	85	2.23534e-06
3707.68	5	4	0	1	CH-S	100	3.2481e-06
4655	6	5	0	3	C-S	100	8.00576e-05
4363.91	6	5	0	2	CH-S	100	9.83859e-05
3416.59	5	4	0	0	CH	100	0.00017991
4201.86	5	5	0	2	C-S	81	0.000407739
4072.81	6	5	0	1	CH-S	98	0.00950192
3781.72	6	5	0	0	CH	98	0.0428565
4437.95	7	6	0	1	C-S	83	0.173528
5020.14	7	6	0	3	C-S	99	0.479716
4729.04	7	6	0	2	C-S	99	0.582962
